# Supplementary material for: Controllable synthesis of hollow spherical nickel chalcogenide (NiS2 and NiSe2) decorated with graphene for efficient supercapacitor electrodes
Source: Royal Society of Chemistry journal article supplement (doi:10.1039/d0ra10659c), 2021-01-01
Supplement: d0ra10659c1.pdf [file d0ra10659c1.pdf]

## Controllable synthesis of hollow spherical nickel chalcogenide (NiS<sub>2</sub> and NiSe<sub>2</sub>) decorated with graphene for efficient supercapacitor electrodes

Min Lu<sup>a\*</sup>, Ming-yuan Sun<sup>a</sup>, Xiao-hui Guan<sup>a</sup>, Xue-mei Chen<sup>a\*</sup>, and Guang-Sheng Wang<sup>b\*</sup>

<sup>a</sup>School of Chemical Engineering, Northeast Electric Power University, Jilin 132000, P. R. China.

<sup>b</sup>Key Laboratory of Bio-Inspired Smart Interfacial Science and Technology of Ministry of Education, School of Chemistry, Beihang University, Beijing 100191, P. R. China. wanggsh@buaa.edu.cn

**Synthesis of graphene oxides.** In a typical procedure, pristine graphite powers (3 g, 325mesh) was put into an 80°C solution of concentrated H<sub>2</sub>SO<sub>4</sub> (15 ml), K<sub>2</sub>S<sub>2</sub>O<sub>8</sub> (2.5 g), and P<sub>2</sub>O<sub>5</sub>(2.5 g). The mixture was kept at 80°C for 6h. Then, the mixture was diluted with 500 ml of deionized (DI) water. Then, the mixture was filtered and washed with water to remove the residual acid. The product was dried at 60°C overnight to obtain pre-oxidized graphite powder. This powder was added into cold (0°C) concentrated H<sub>2</sub>SO<sub>4</sub> (115 ml). Then, KMnO<sub>4</sub> (15 g) was slowly added, with the temperature of mixture kept below 20°C. After the addition of 250 ml of water (keep the temperature below 50°C), the mixture was stirred for 2 h, and then an additional 700 ml of water was added. After that, 10 ml of 30% H<sub>2</sub>O<sub>2</sub> was added into the mixture, and the solution changed into brilliant yellow, accompanied by the generation of bubbles. The mixture was filtered and washed with diluted HCl aqueous solution (10 wt.%, 1 L) to remove metal ions. The brownish yellow solution was centrifuged at 10,000 rpm, supernatant solution was decanted away, and the resulting material was subjected to multiple washings with water until the pH was 7.

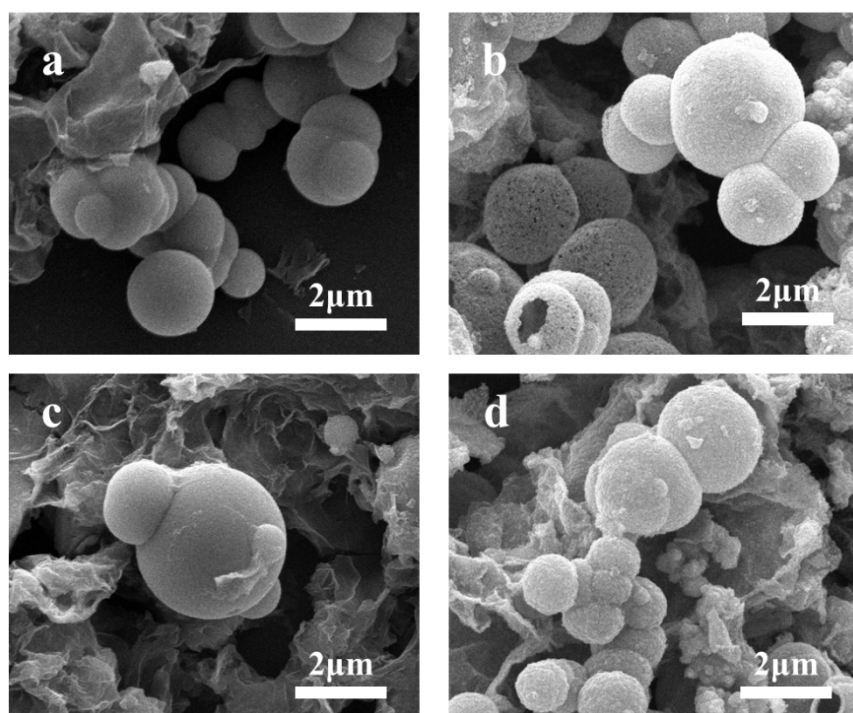

**Fig. S1** SEM images of the product during prepare NiS<sub>2</sub> at different time: (a) 10%-NiS<sub>2</sub>/GO; (b) 15%-NiS<sub>2</sub>/GO; (c) 25%-NiS<sub>2</sub>/GO; (d) 30%-NiS<sub>2</sub>/GO.

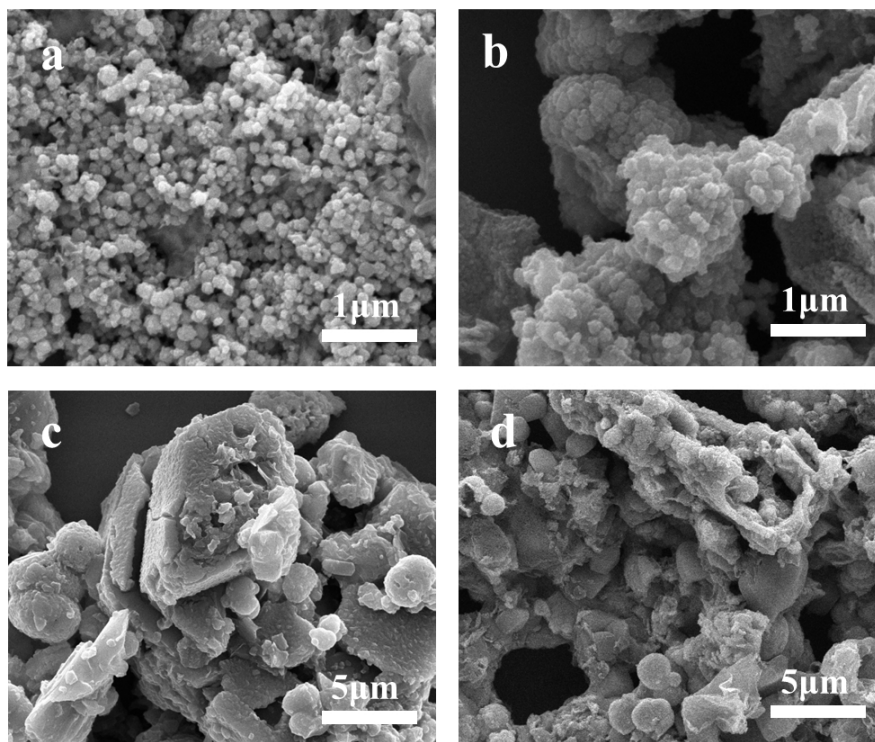

**Fig. S2** SEM images of the product during prepare  $\text{NiSe}_2$  at different time: (a) 1%- $\text{NiSe}_2/\text{rGO}$ ; (b) 5%- $\text{NiSe}_2/\text{rGO}$ ; (c) 7%- $\text{NiSe}_2/\text{rGO}$ ; (d) 10%- $\text{NiSe}_2/\text{rGO}$ .

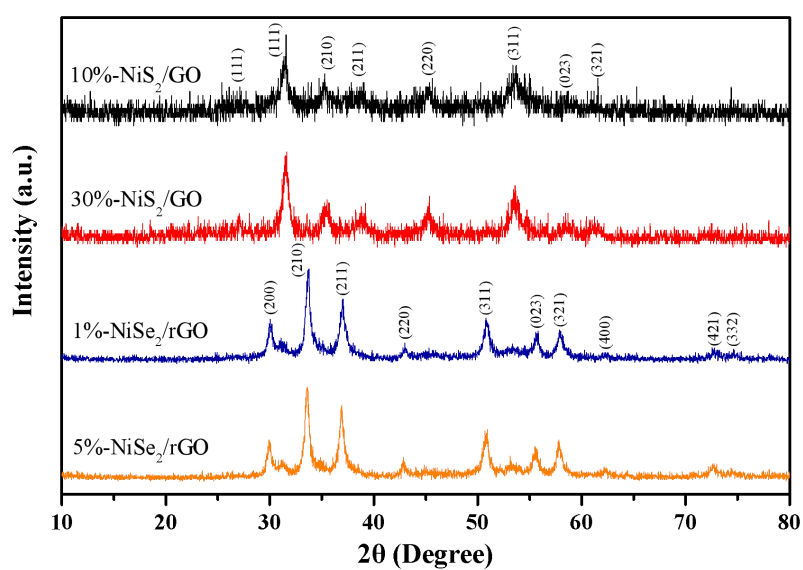

**Fig. S3** XRD pattern of the product 10%- $\text{NiS}_2/\text{GO}$ , 30%- $\text{NiS}_2/\text{GO}$ , 1%- $\text{NiSe}_2/\text{rGO}$  and 5%- $\text{NiSe}_2/\text{rGO}$ .

5%-NiSe<sub>2</sub>/rGO.

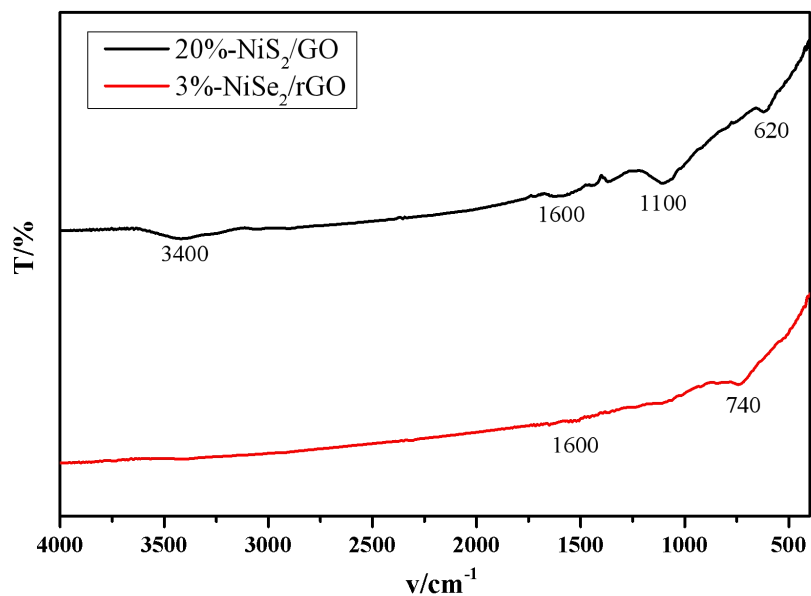

**Fig. S4** FT-IR for 20%-NiS<sub>2</sub>/GO and 3%-NiSe<sub>2</sub>/rGO.

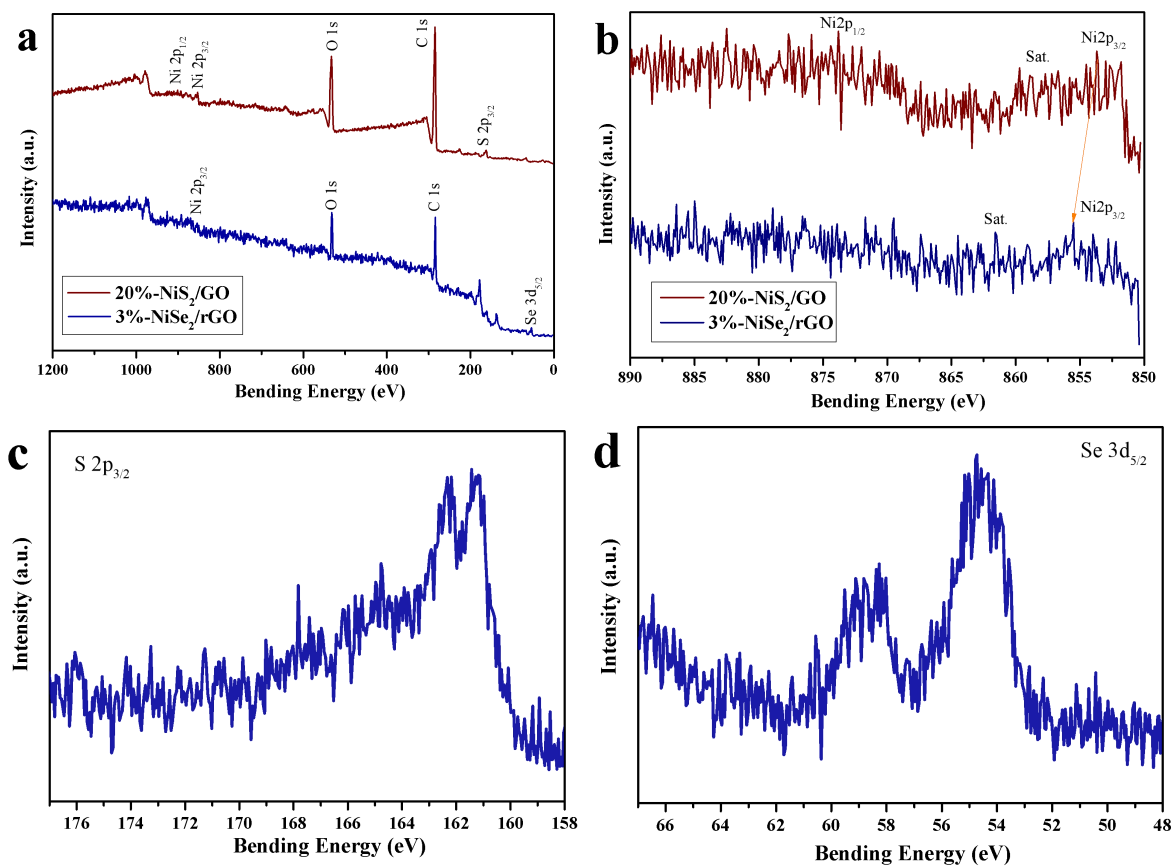

**Fig. S5** XPS spectra for: (a) 20%-NiS<sub>2</sub>/GO, 3%-NiSe<sub>2</sub>/rGO; (b) Ni 2p; (c) S 2p; (d) Se 3d.

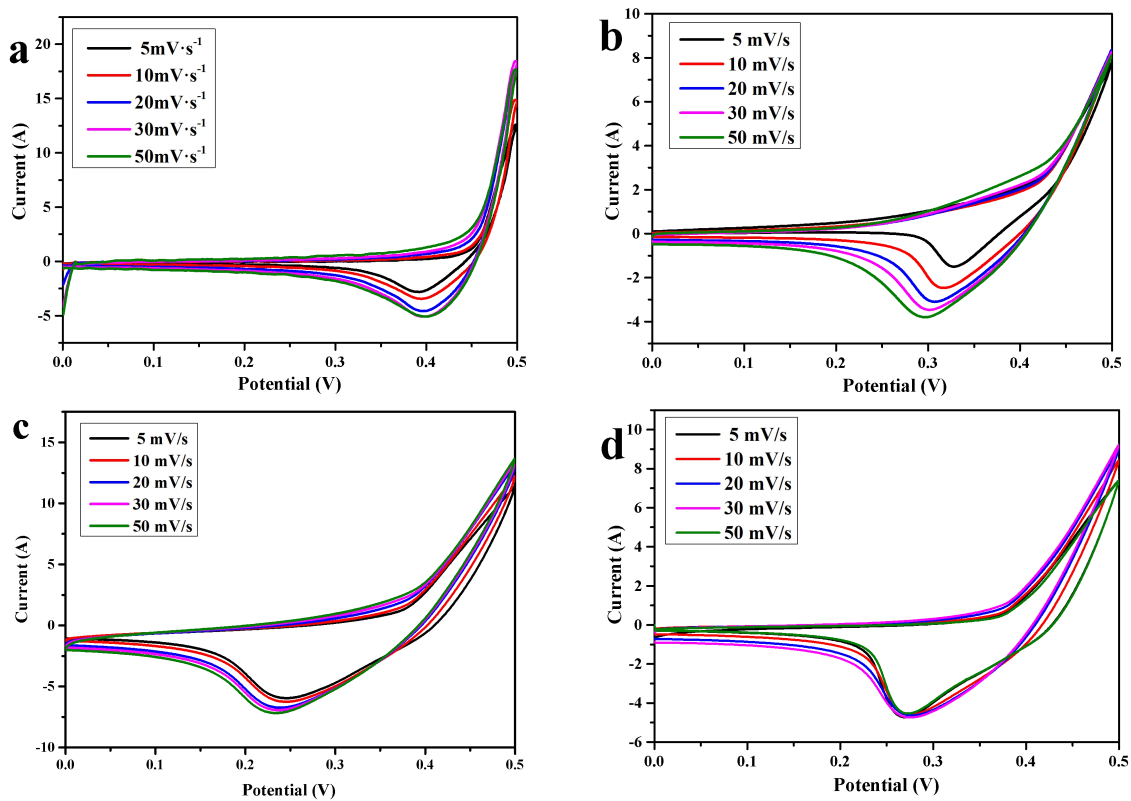

**Fig. S6** CV curves of the electrodes at different scan rates: (a)  $\text{NiS}_2$ ; (b) 10%- $\text{NiS}_2/\text{GO}$ ; (c) 20%- $\text{NiS}_2/\text{GO}$ ; (d) 30%- $\text{NiS}_2/\text{GO}$ .

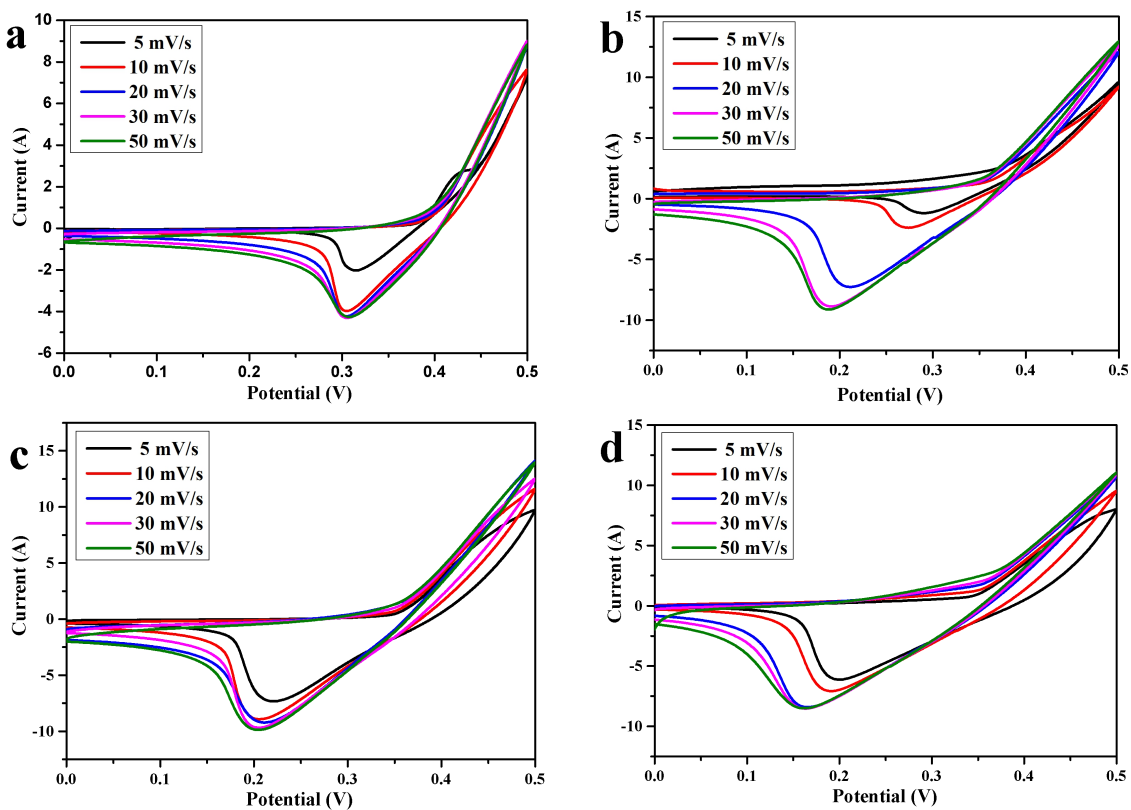

**Fig. S7** CV curves of the electrodes at different scan rates: (a) NiSe<sub>2</sub>; (b) 1%-NiSe<sub>2</sub>/rGO; (c) 3%-NiSe<sub>2</sub>/rGO; (d) 5%-NiSe<sub>2</sub>/rGO.

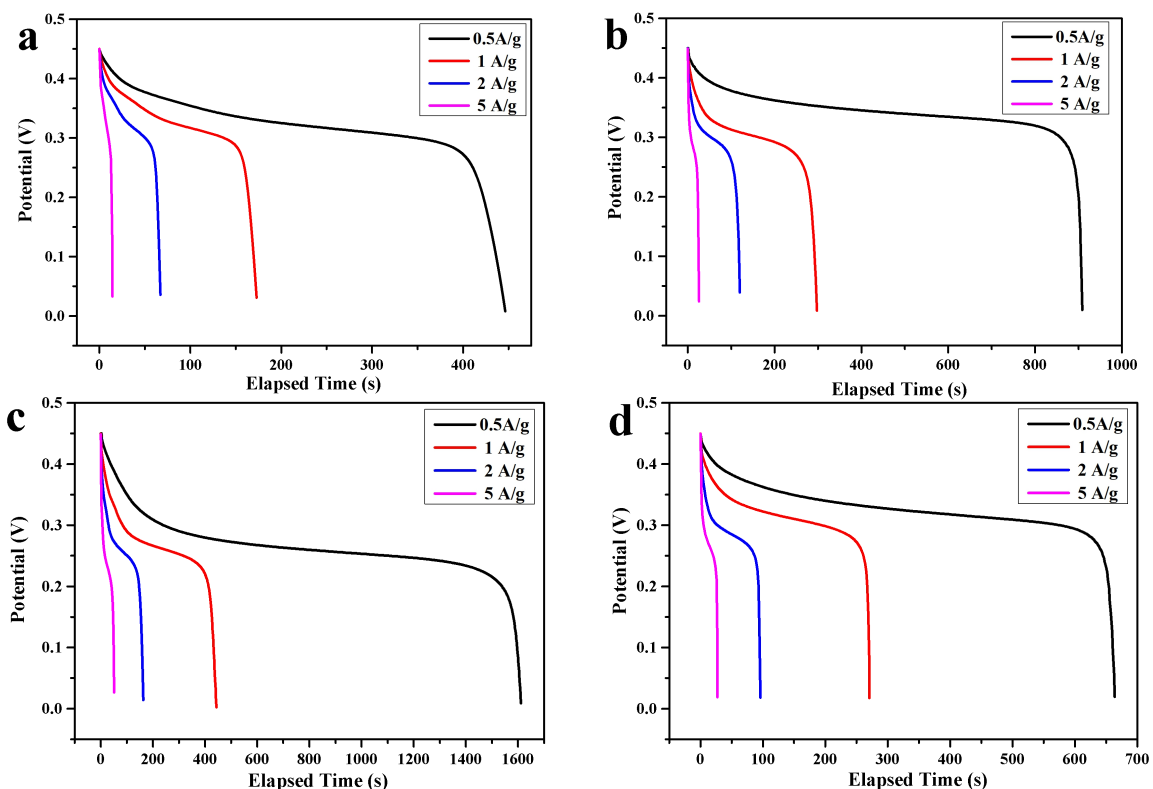

**Fig. S8** Discharge curves of the electrodes at various current densities: (a) NiS<sub>2</sub>; (b) 10%-NiS<sub>2</sub>/GO; (c) 20%-NiS<sub>2</sub>/GO; (d) 30%-NiS<sub>2</sub>/GO.

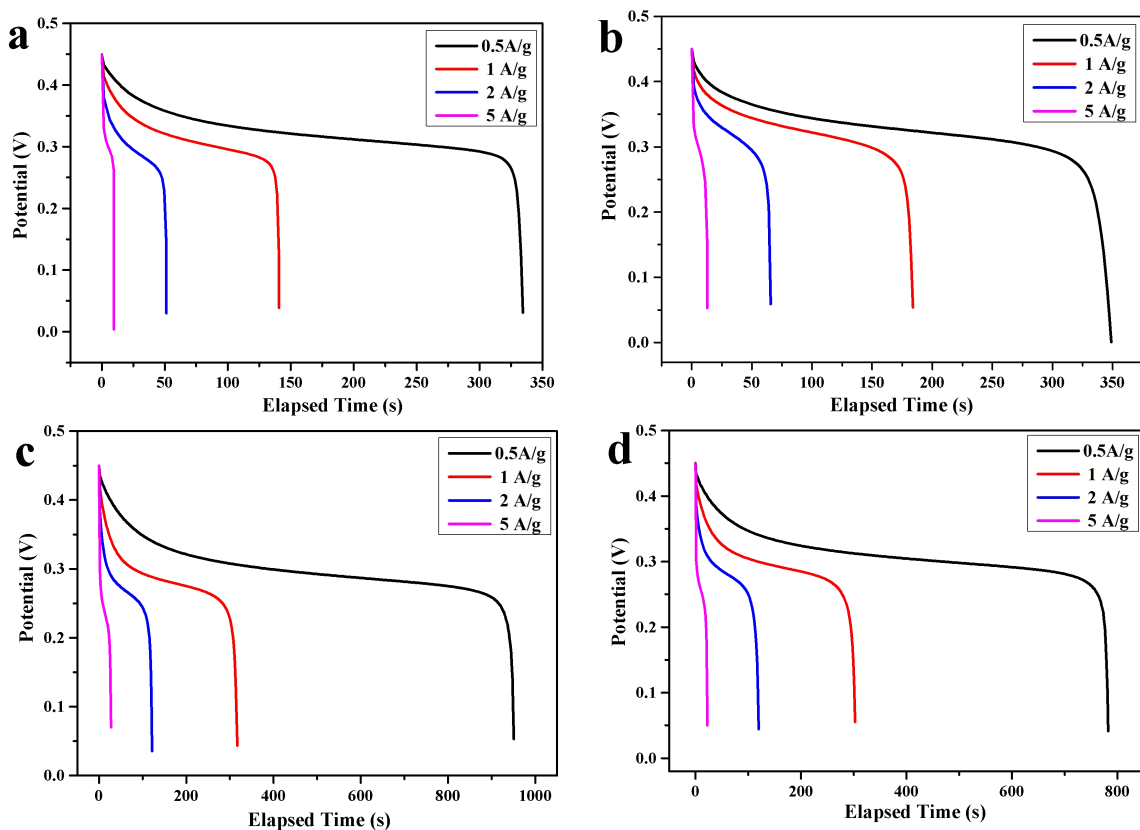

**Fig. S9** Discharge curves of the electrodes at various current densities: (a) NiSe<sub>2</sub>; (b) 1%-

NiSe<sub>2</sub>/rGO; (c) 3%-NiSe<sub>2</sub>/rGO; (d) 5%-NiSe<sub>2</sub>/rGO.

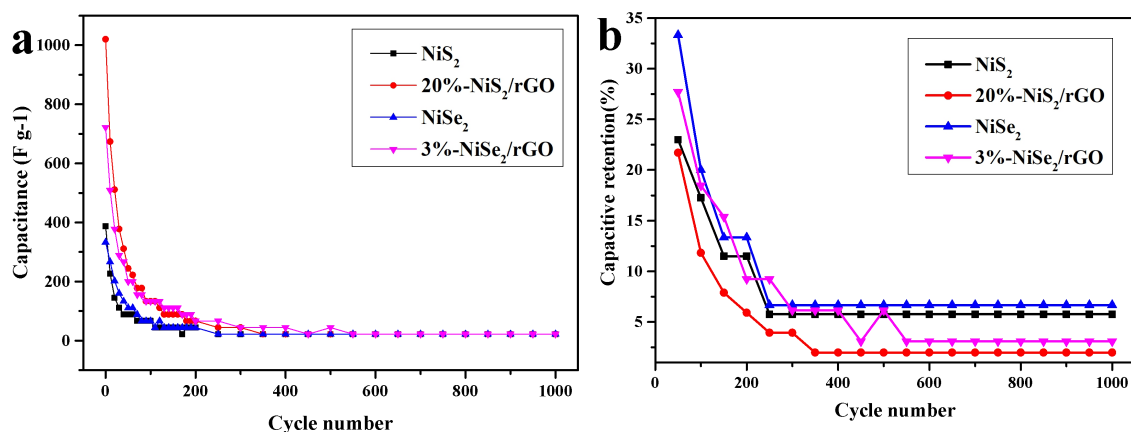

**Fig. S10** (a) cycle performance curves of the four electrodes at a current density of 1 A·g<sup>-1</sup>; (b) the capacitive retentions of the four electrodes during 1000 cycles.

**Table S1** Performance comparisons with other works

| Sample                     | Morphology<br>and structure | Specific<br>capacitance<br>(0.5A·g <sup>-1</sup> ) | Specific<br>capacitance<br>(1A·g <sup>-1</sup> ) | Specific<br>capacitance<br>(2A·g <sup>-1</sup> ) | Specific<br>capacitance<br>(5A·g <sup>-1</sup> ) |
|----------------------------|-----------------------------|----------------------------------------------------|--------------------------------------------------|--------------------------------------------------|--------------------------------------------------|
| 15%-NiS <sub>2</sub> /GO   | Hollowspheres               | 1213 F·g <sup>-1</sup>                             | 676 F·g <sup>-1</sup>                            | 562 F·g <sup>-1</sup>                            | 373 F·g <sup>-1</sup>                            |
| 25%-NiS <sub>2</sub> /GO   | Hollowspheres               | 810 F·g <sup>-1</sup>                              | 640 F·g <sup>-1</sup>                            | 533 F·g <sup>-1</sup>                            | 409 F·g <sup>-1</sup>                            |
| 7%-NiSe <sub>2</sub> /rGO  | Nanospheres                 | 659 F·g <sup>-1</sup>                              | 622 F·g <sup>-1</sup>                            | 412 F·g <sup>-1</sup>                            | 213 F·g <sup>-1</sup>                            |
| 10%-NiSe <sub>2</sub> /rGO | Nanospheres                 | 537 F·g <sup>-1</sup>                              | 402 F·g <sup>-1</sup>                            | 320 F·g <sup>-1</sup>                            | 124 F·g <sup>-1</sup>                            |
